# Supplementary material for: Photochemical and Oxidative Degradation of Chamazulene Contained in Artemisia, Matricaria and Achillea Essential Oils and Setup of Protection Strategies
Source: Preprints.org preprint supplement (doi:10.20944/preprints202405.0280.v1), 2024-05-06
Supplement: Supplementary file 1 [file supplementary]

**Photochemical and oxidative degradation of chamazulene contained in *Artemisia*, *Matricaria* and *Achillea* essential oils and setup of protection strategies**

Simone Gabbanini,*,1 Jerome Ngwa Neba,2 Riccardo Matera,1 Luca Valgimigli, *,2,3

1 R&D Department, BeC s.r.l., Via C. Monteverdi 49, 47122 Forlì, Italy; [laboratorio@bec-natura.com](mailto:laboratorio@bec-natura.com)

2Department of Chemistry “Ciamician”, University of Bologna, Via Gobetti 85, 40129 Bologna, Italy; [luca.valgimigli@unibo.it](mailto:luca.valgimigli@unibo.it)

3 Tecnopolo di Rimini, Via D. Campana 71, 47922 Rimini, Italy.

APPENDIX

(Supplementary data)

Table of Contents

| **Figure S1.** Spectral radiation power distribution of Ultra-Vitalux lamp | Page 2 |
| --- | --- |
| **Figure S2.** Fragmentation of parent peak *m/z* 215, calculated by Mass Frontier software | Page 2 |
| **Figure S3**. GC-MS calibration curve of CA in Total Ion Count (TIC) mode | Page 3 |
| **Figure S4**. LC-PDA calibration curve of CA at 349 nm | Page 3 |
| **Figure S5**. Example of HPLC-PDA chromatograms of mixtures of CA and antioxidants. | Page 4 |
| **Figure S6**. Example of LC-PDA chromatograms of mixtures of CA (0.17 mM) with UV filters | Page 5 |
| **Figure S7.**Spectrophotometric evaluation of CA photodegradation in the absence of oxygen | Page 6 |
| **Figure S8.** Detail of chamazulene degradation with selected antioxidants, incubated at 50°C. | Page 6 |


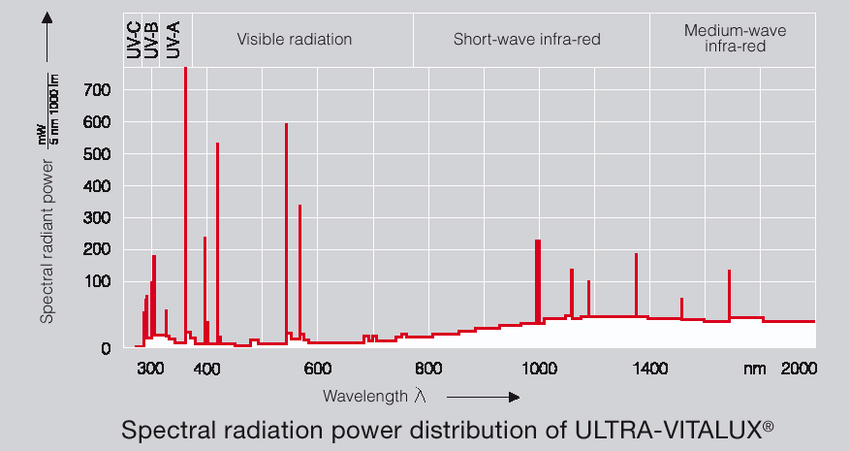


**Figure S1.** Spectral radiation power distribution of Osram Ultra-Vitalux**®** lamp at various wavelengths. Data provided by the lamp manufacturer, reported only as a reference.

**
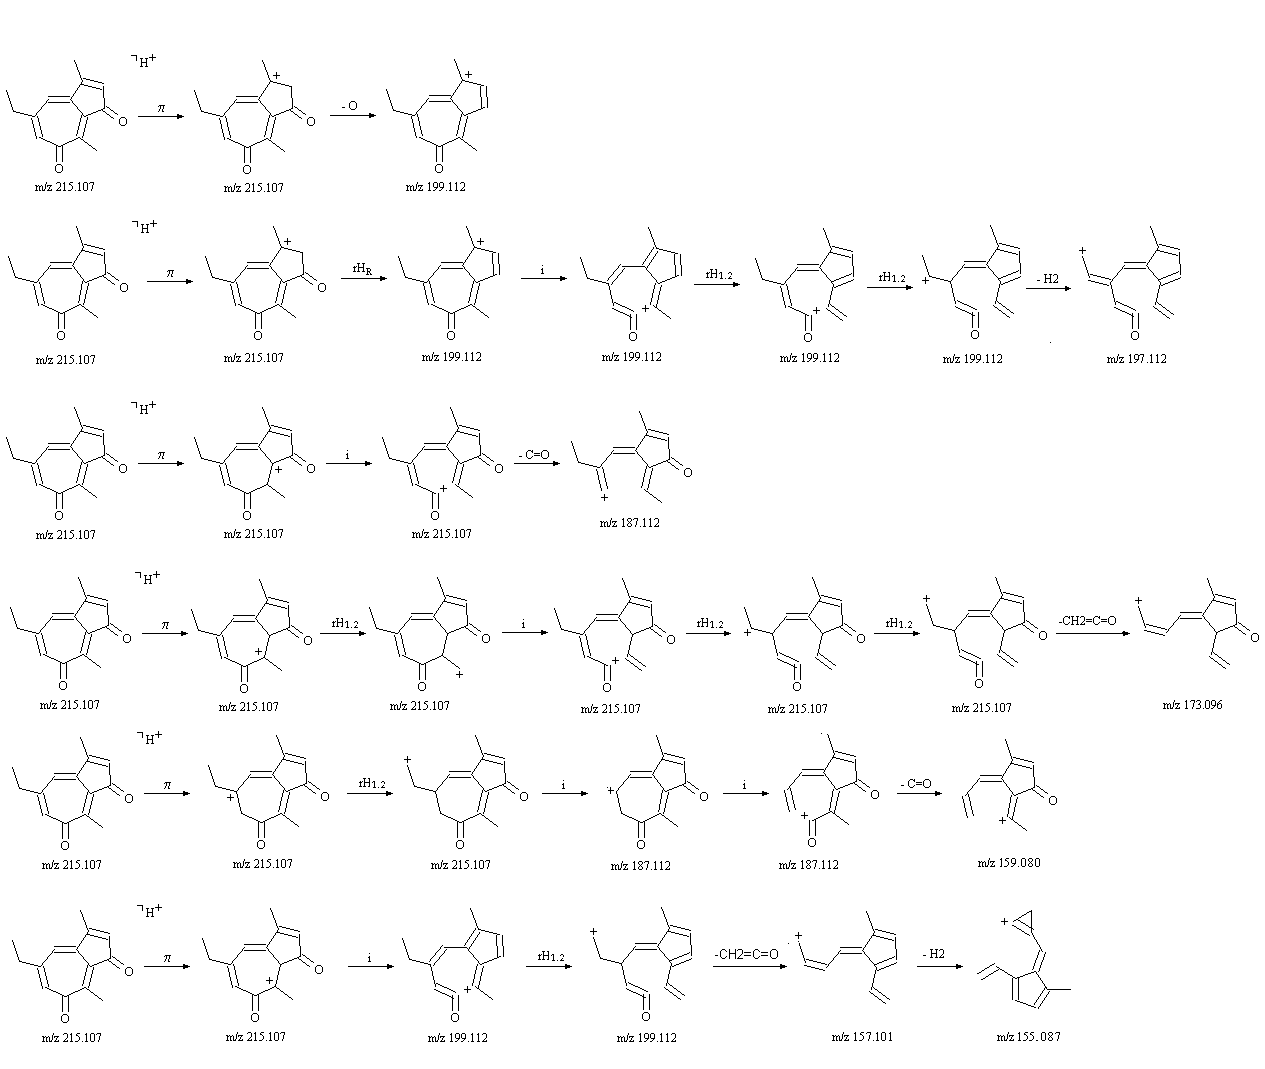
**

Figure S2. Fragmentation ions of parent peak *m/z* 215, in positive mode attributed to chamazulene quinone (6), calculated by Mass Frontier software. The fragmentation pattern explains ions with *m/z* 197, 187 and 159 shown in Figure 9.


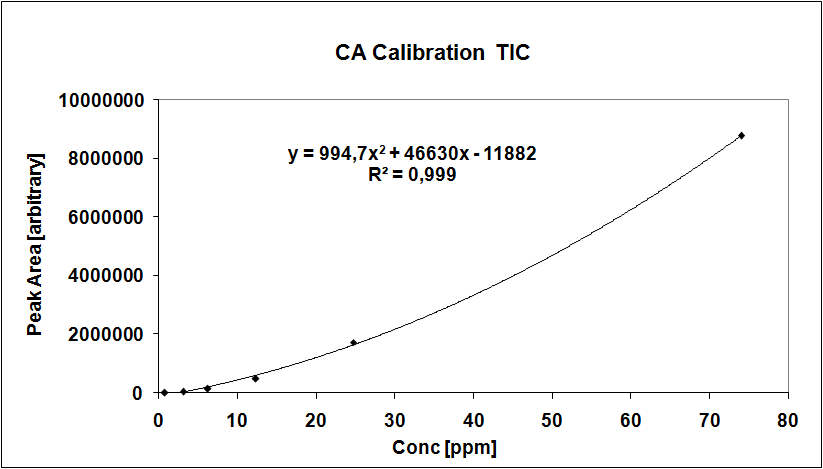


**Figure S3**. GC-MS calibration curve of CA in Total Ion Count (TIC) mode, used to evaluate the influence of solvent type and presence of oxygen on the photostability of CA alone.


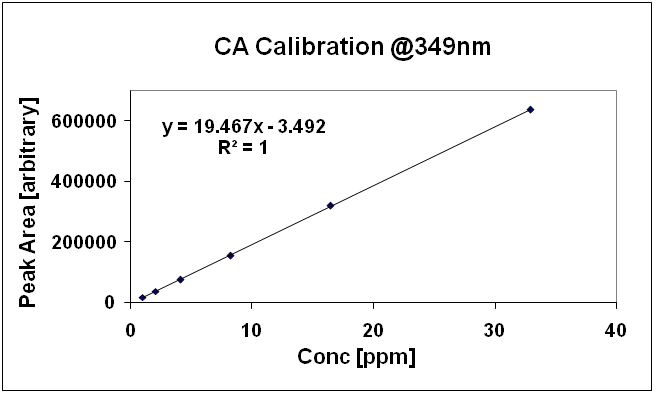


**Figure S4**. LC-PDA calibration curve of CA at 349 nm used for evaluation of photo and thermal stability experiments of CA in presence of antioxidants and sunscreens.


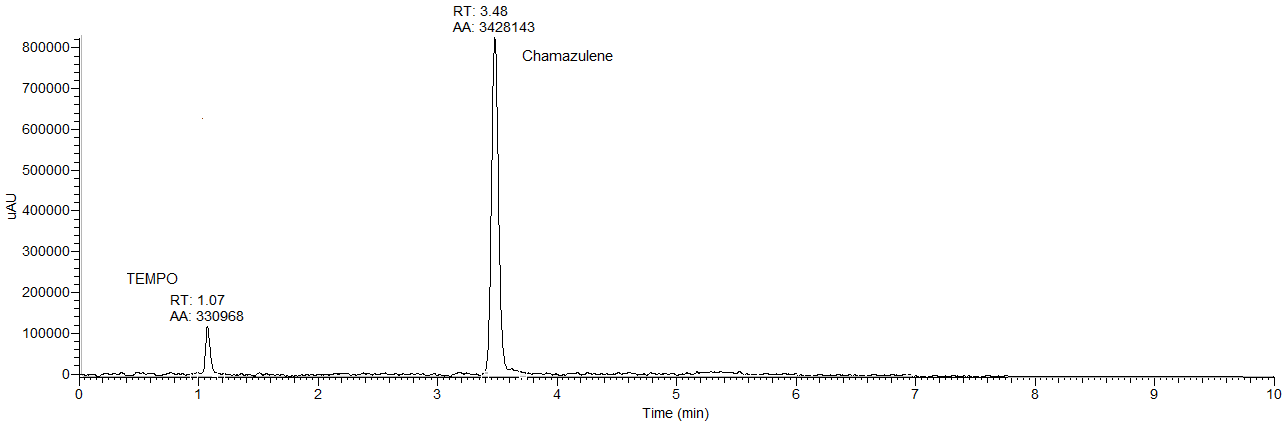

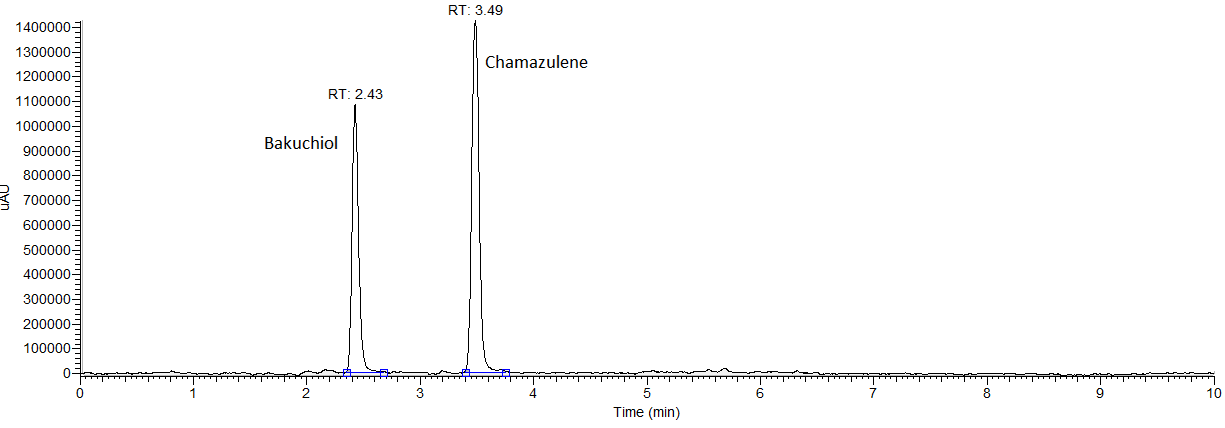


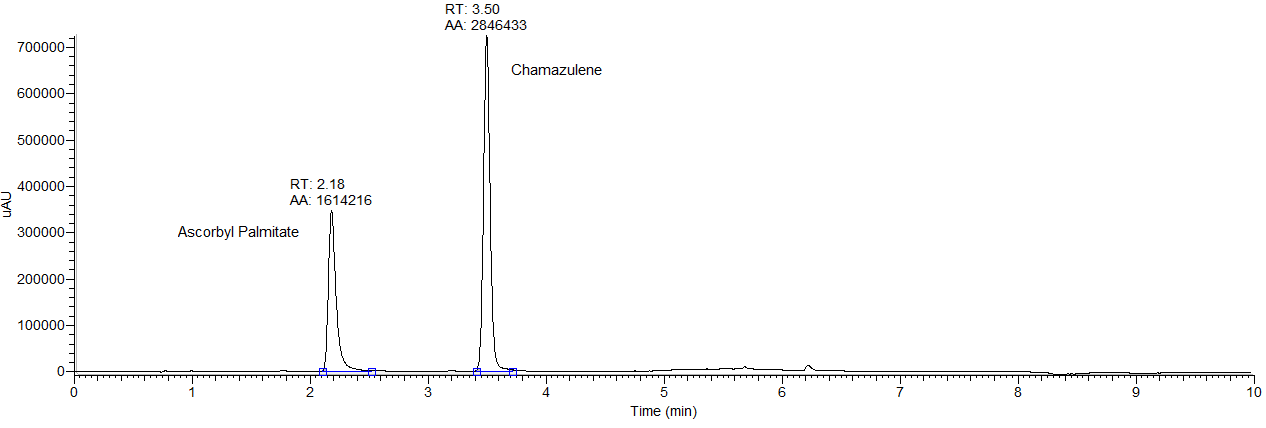

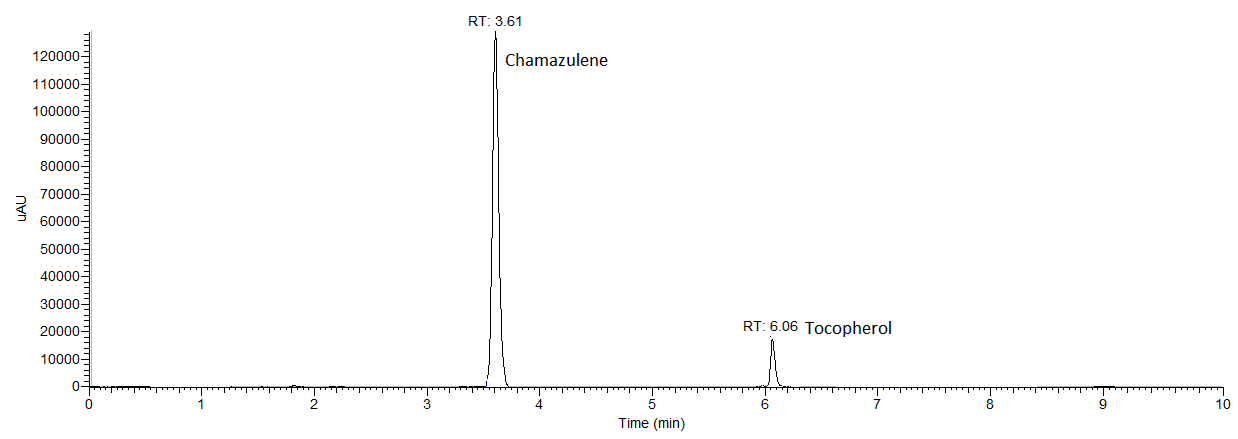


**Figure S5**. Example of HPLC-PDA chromatograms of mixtures of CA:antioxidants in molar ratio 1:10. From top to bottom: TEMPO, bakuchiol, ascorbyl palmitate, tocopherol.


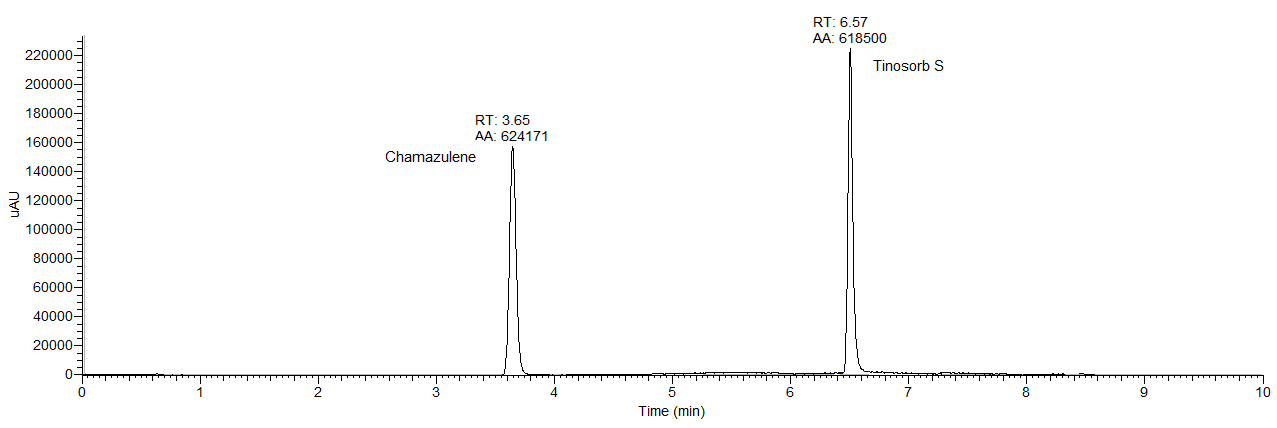


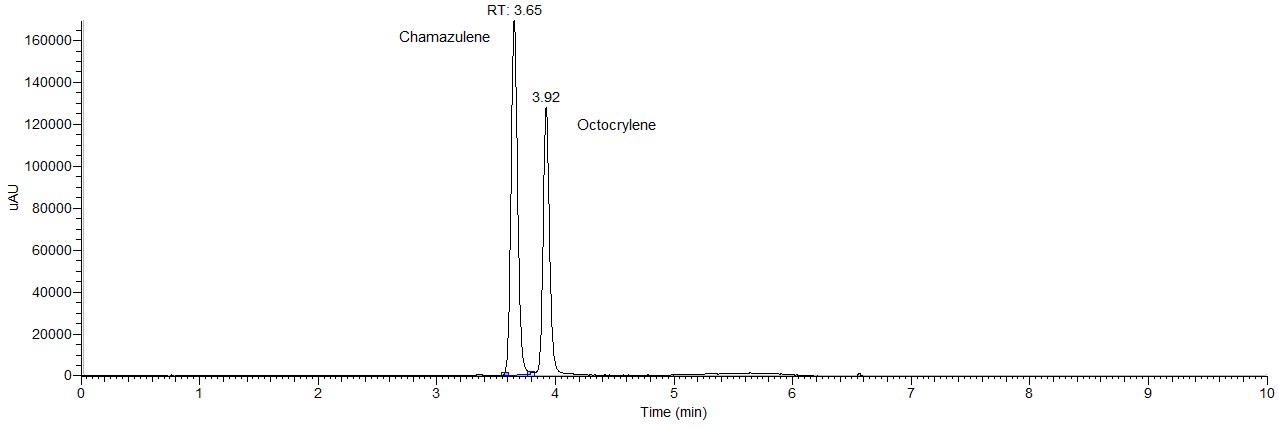


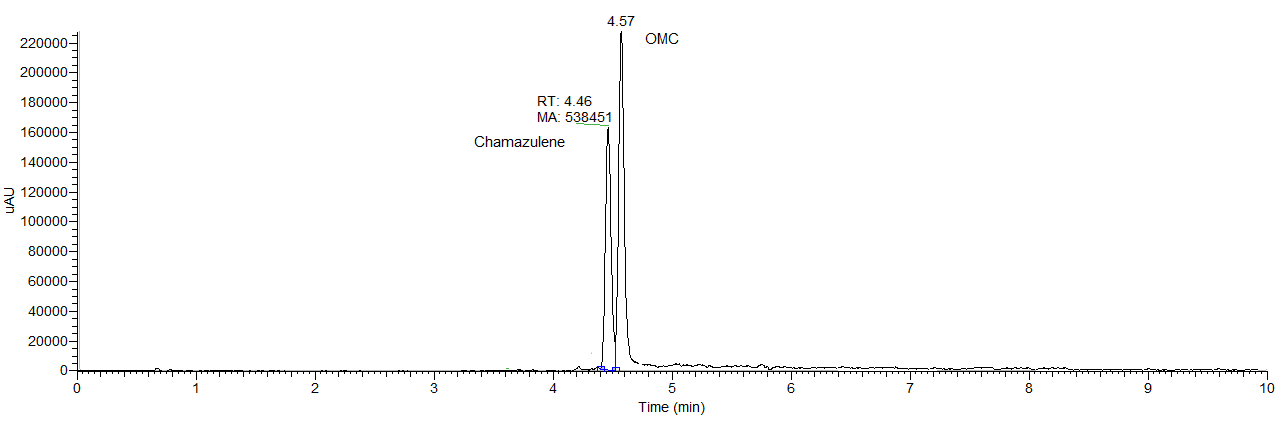


**Figure S6**. Example of LC-PDA chromatograms of mixtures of CA (0.17 mM) with UV filters at a concentration of 5% w/v (from top to bottom:, Tinosorb**®** S, octocrylene, octyl methoxycinnamate). The choormatographic conditions were slightly changed for octlyl methoxycinnamate to resolv coelution with chamazulene..

**
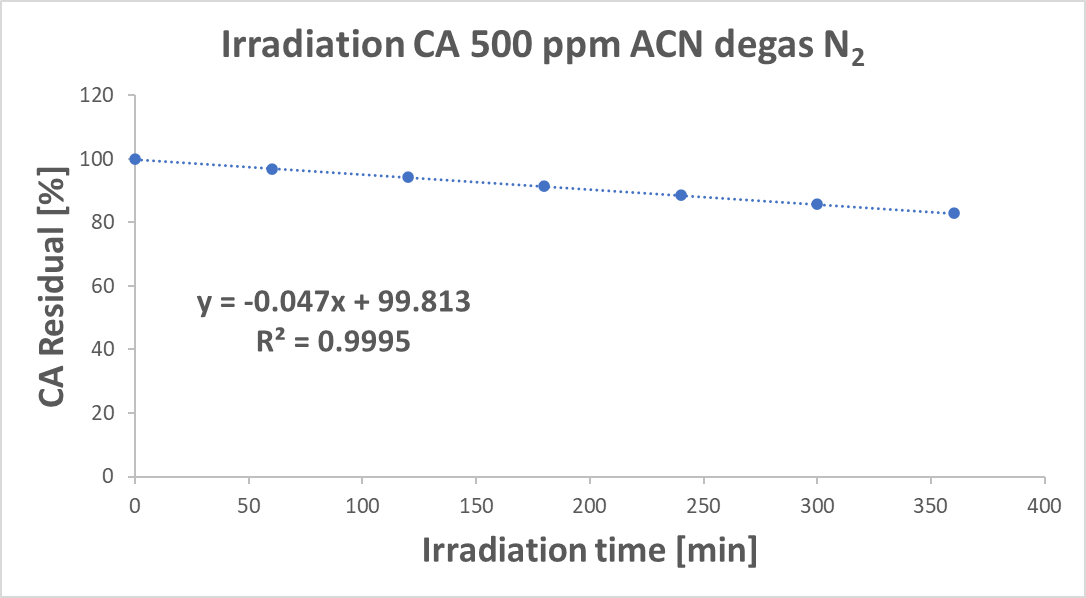
**

**Figure S7.**Spectrophotometric evaluation of CA photodegradation in the absence of oxygen. Measurments were perfomed in a sample of CA 500 ppm in acetonitrile in a 3.5 mL Teflon sealed quartz cu-vette and degassed for 5 minutes with an abundant N2 stream. The cuvette was subjected to UVA-UVB radiation at100 mW/cm2 (strong photooxidation conditions)for 6 hours. At regular time intervals a spectrophotometric reading was performed without opening the cuvette. The rate of the CA degradation is reported.

**
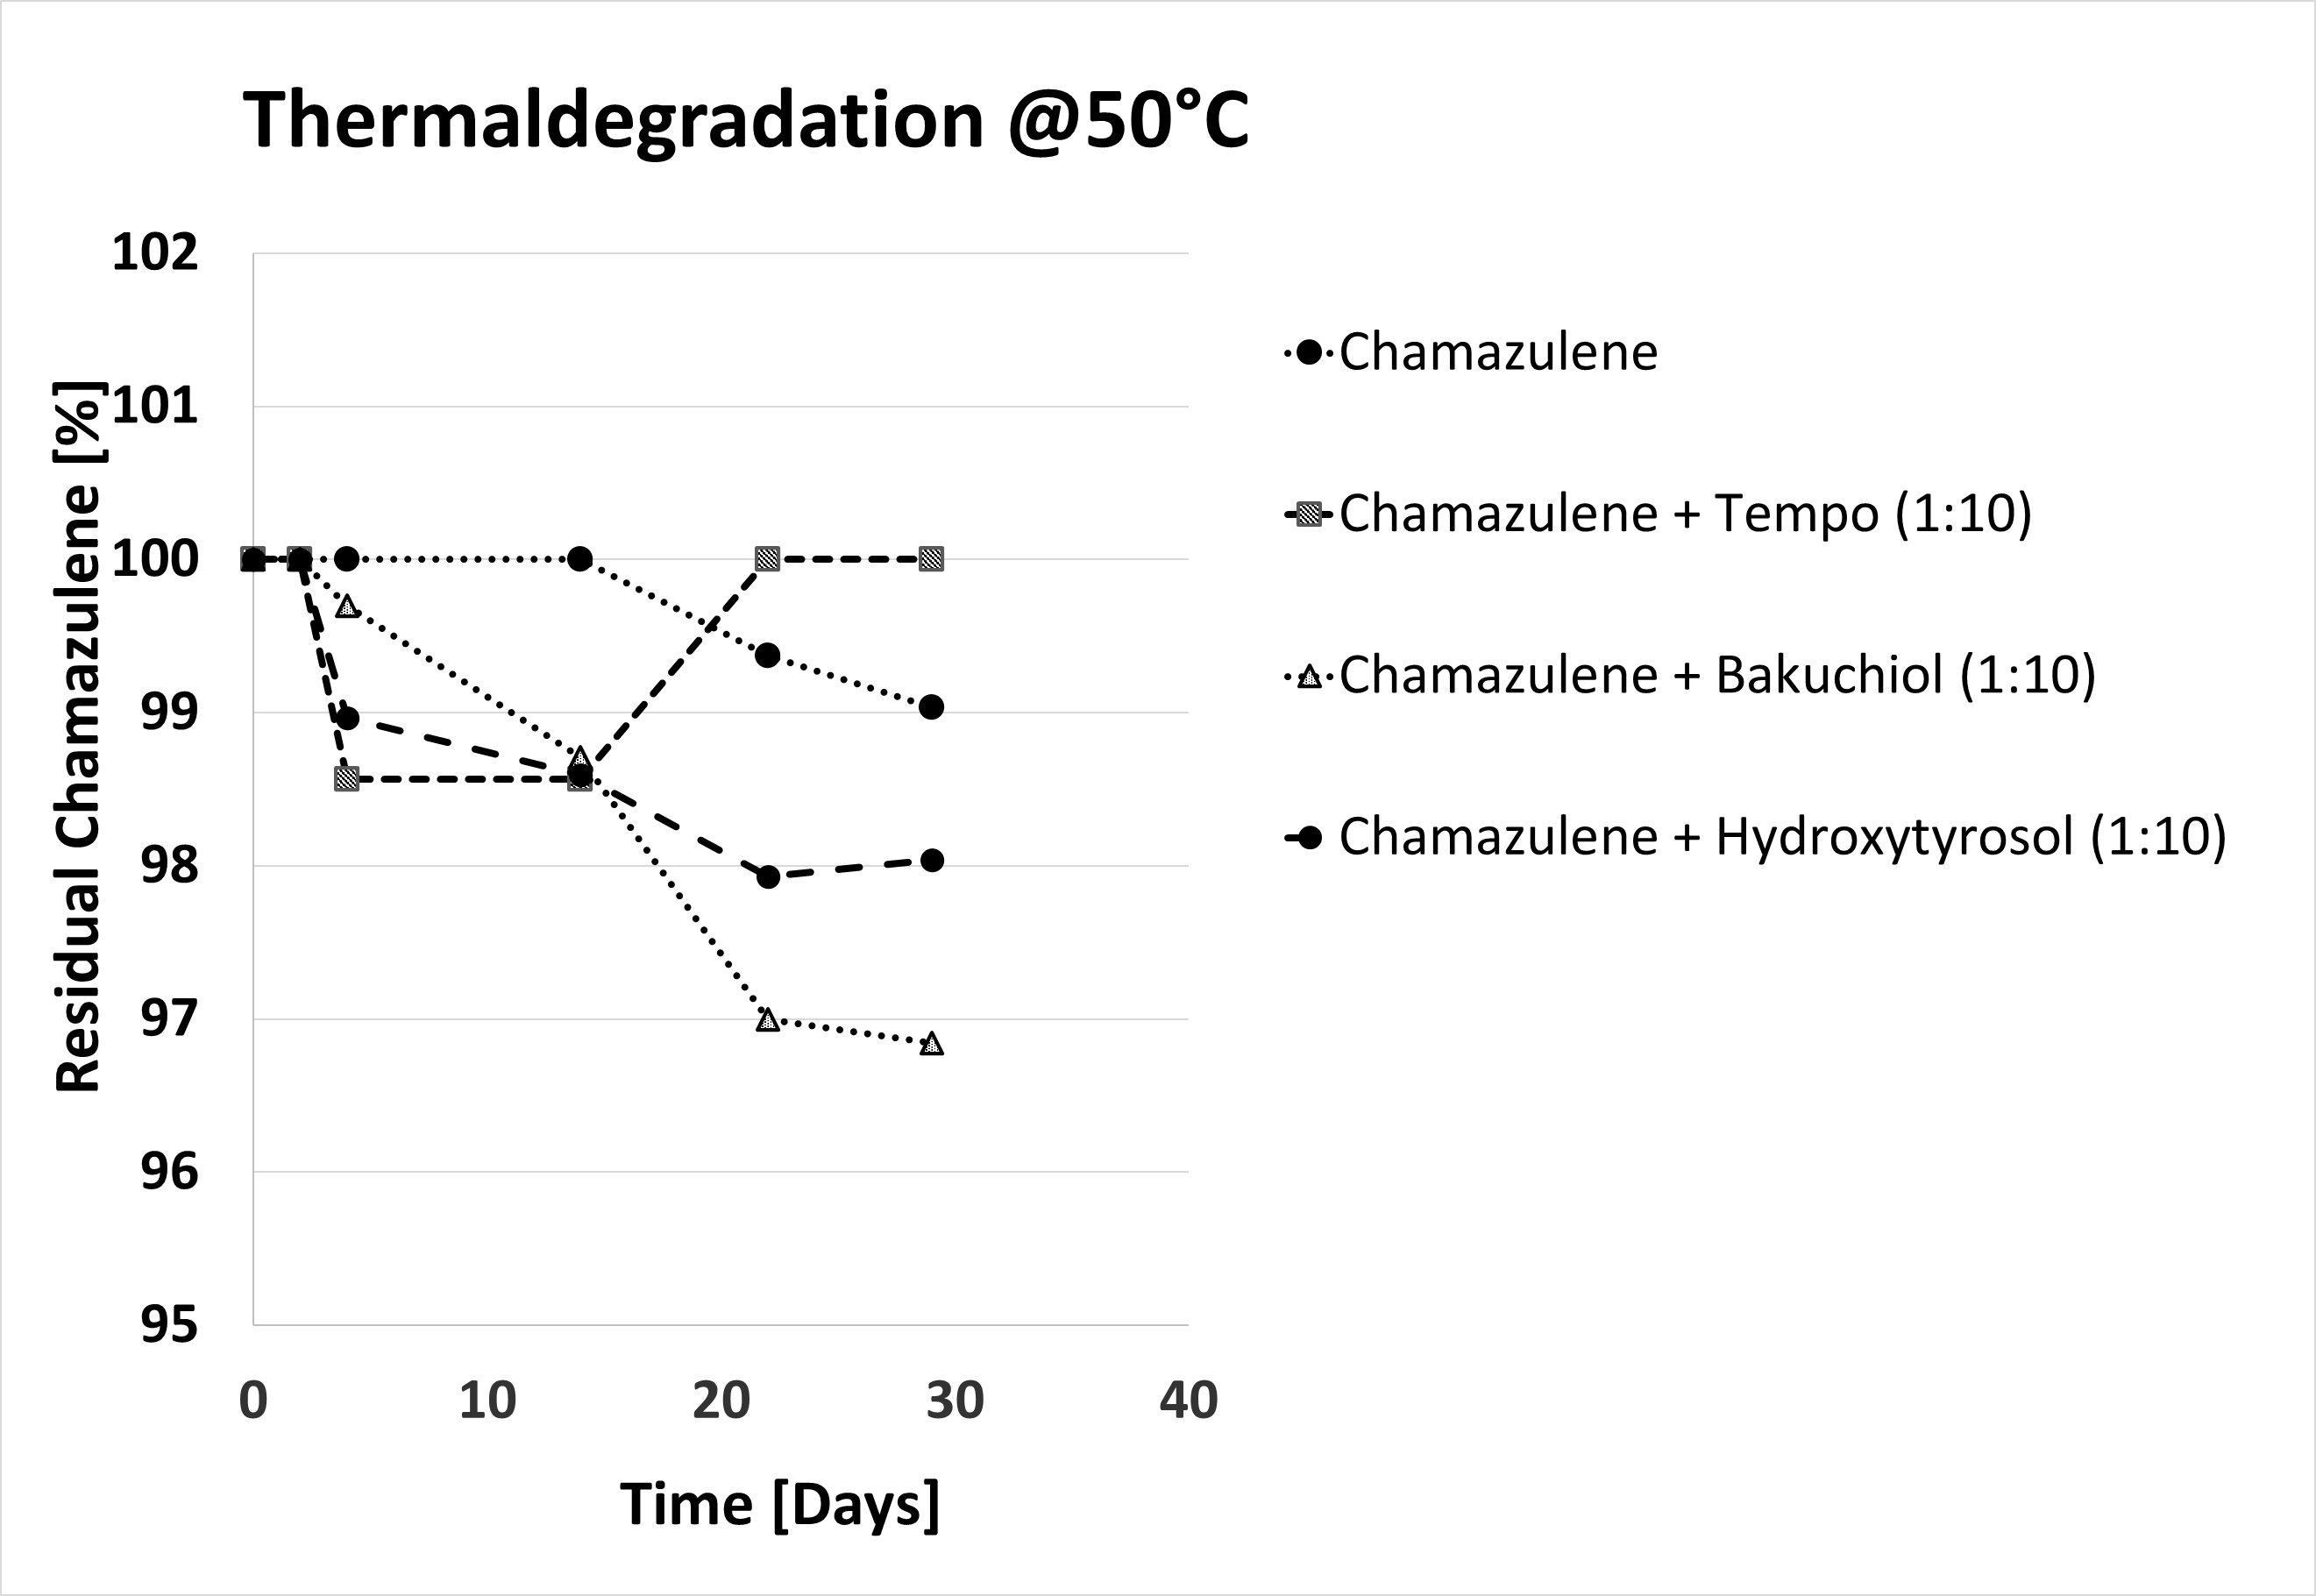
**

Figure S8. Detail of thermal degradation of chamazulene in solution, alone or in the presence of selected antioxidants, incubated at 50°C. This figure represents and expansion of Figure 12 in the manuscript.
